# Supplementary material for: A novel water-soluble and self-doped conducting polyaniline graft copolymerElectronic supplementary information (ESI) available: schematic diagrams; XPS and FTIR spectra; GPC profile. See http://www.rsc.org/suppdata/cc/b3/b309346h/
Source: Royal Society of Chemistry journal article supplement (doi:10.1039/b309346h), 2003-01-01
Supplement: b309346h.doc [file b309346h.doc]

# A water-soluble and self-doped conducting polyaniline graft copolymer

# Woo Jin Bae,*a* Keon Hyeong Kim,*a* Yun Heum Park**b* and Won Ho Jo**a*

a Hyperstructured Organic Materials Research Center and School of Materials Science and Engineering, Seoul National University, Seoul 151-742, Korea. Fax: 82-2-885-1748; Tel: 82-2-880-7192; E-mail: whjpoly@plaza.snu.ac.kr

### b School of Applied Chemistry and Chemical Engineering, Sungkyunkwan University, Suwon 440-746, Korea. Fax: 82-31-290-7330; Tel: 82-31-290-7312; E-mail: yhpark@skku.edu

## Electronic supplementary information

#### Schematic diagram (a) of doped and de-doped state of PSSA-*g*-PANI and PSSA/PANI blend, and structural change (b)of PSSA-*g*-PANI during de-doping process


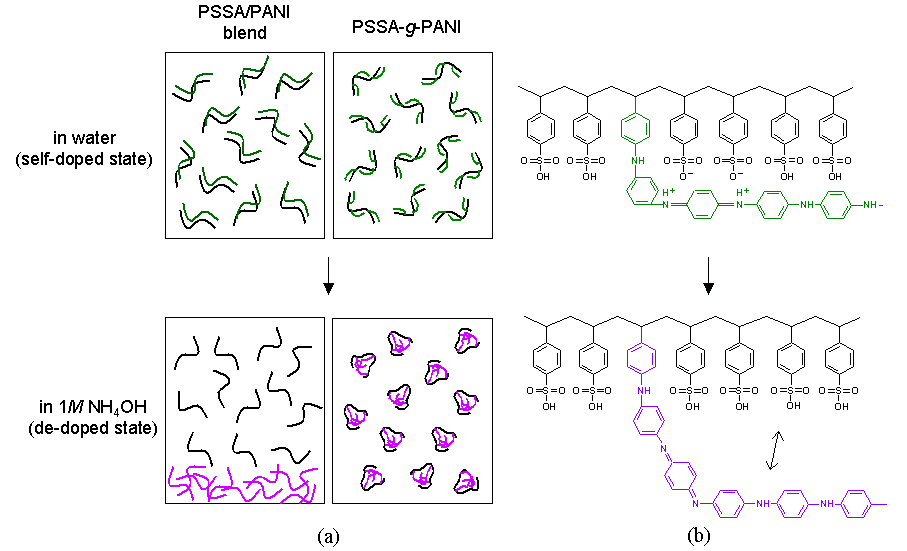


Changes in intrinsic viscosity of PSSA-*g*-PANI during doping and de-doping


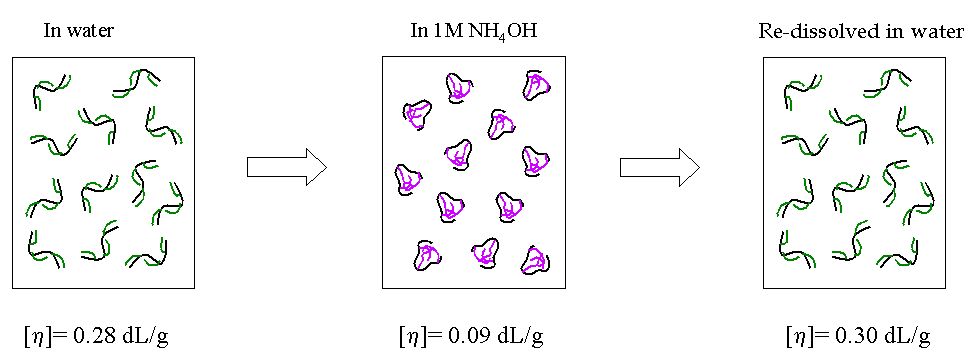


XPS spectra of (a) doped PSSA-*g*-PANI and (b) de-doped PSSA-*g*-PANI


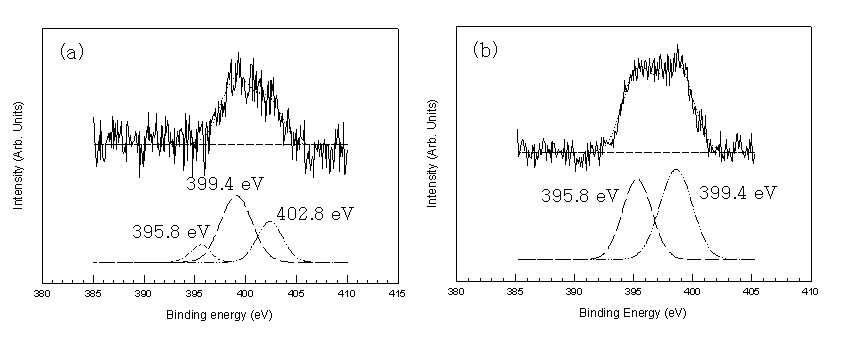


| Structure | Binding energy |
| --- | --- |
| quinoid imine (=N- structure) | 395.8 eV |
| benzenoid amine (-NH- structure) | 399.4 eV |
| Positively charged nitrogen (-N+- structure) | 402.8 eV |

It is noted that the oxidation level of 0.5 evaluated from FT-IR experiment is coincident with the value of 0.43 determined quantitatively by XPS analysis. The doping level was estimated ca. 35 mol%. (N 1s core-level spectra)

FTIR spectra of (a) P(SSNa-*co*-BOC-AMS), (b) P(SSA-*co*-AMS) and (c) PSSA-*g*-PANI, where Q, B and op denote the quinoid ring, benzenoid ring and out-of-plane, respectively

GPC profile of PSSA-*g*-PANI

Column: UltrahydrogelTM 500, 7.8 300 mm

Eluent: water/DMF(v/v=9.5/0.5)+0.5 M NaOH

Flow rate: 0.6 ml/min
